# Supplementary material for: Land use shapes riverine nutrient and sediment concentrations on Moorea, French Polynesia
Source: Research Square preprint supplement (doi:10.21203/rs.3.rs-6247948/v1), 2025-04-20
Supplement: Supplementary file 1 [file 40b89483edf97e2160005d63.docx]

**Supplementary materials S1. Water chemistry variability in space and time**

Mean, range, and standard deviation of Dissolved Inorganic Nitrogen, Phosphate, N:P Ratio, and Total Suspended Solids in each watershed.


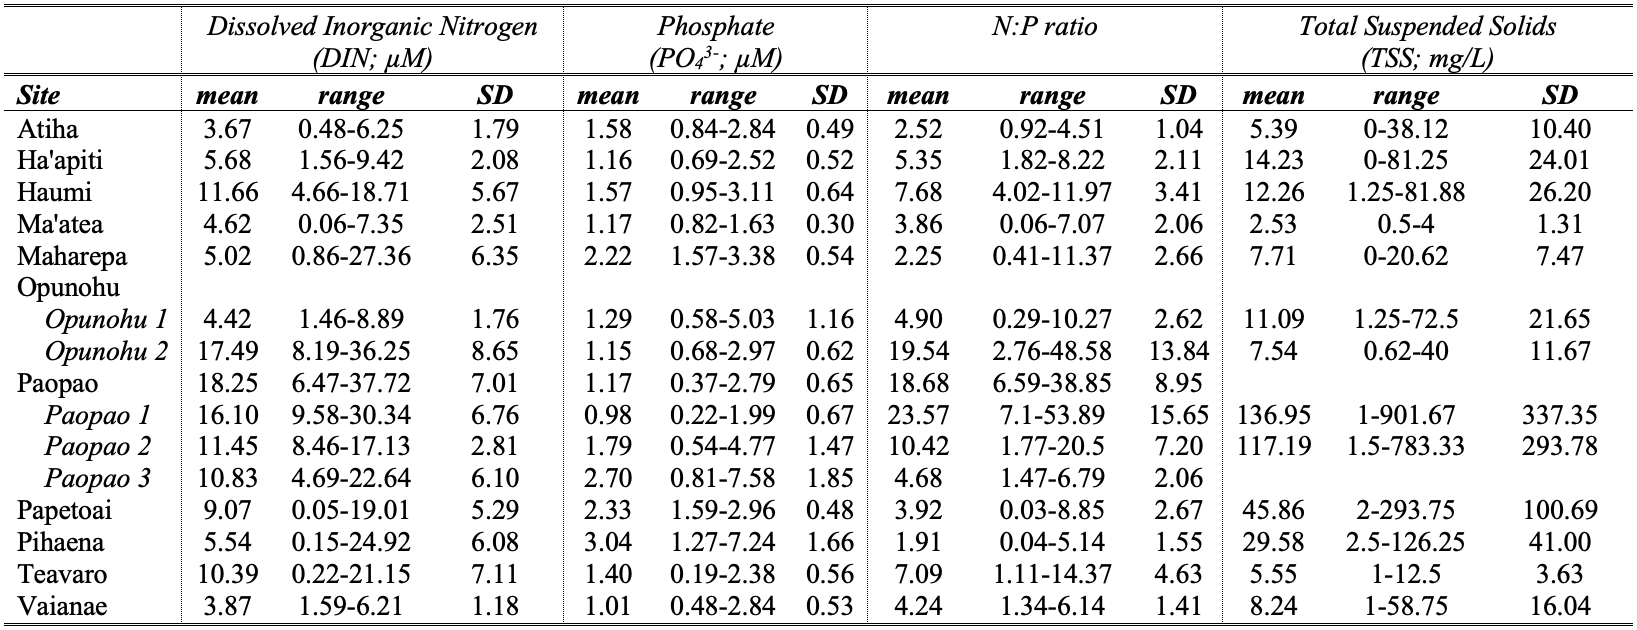


**Supplementary materials S2. Results from ANOVA of river chemistry**

ANOVA summaries for linear models of each major water chemistry parameter as a function of season, watershed (site), and their interaction. Water chemistry parameters as follows: Dissolved Inorganic Nitrogen (DIN), Nitrite (NO2-), Nitrate (NO3-), Ammonium (NH4+), Phosphate (PO43-), and Total Suspended Solids (TSS).

| **Response** | **Term** | **Df** | **Sum Sq** | **Mean Sq** | **F value** | **p** | |
| --- | --- | --- | --- | --- | --- | --- | --- |
| **DIN** | *Season* | 1 | 1.08 | 1.08 | 4.86 | 0.029 | * |
|  | *Site* | 13 | 55.25 | 4.25 | 19.14 | 0 | *** |
|  | *Season:Site* | 13 | 7.77 | 0.6 | 2.69 | 0.002 | ** |
|  | *Residuals* | 157 | 34.86 | 0.22 |  |  |  |
|  |  |  |  |  |  |  |  |
| **NO2-** | *Season* | 1 | 0 | 0 | 0.36 | 0.548 |  |
|  | *Site* | 13 | 3.32 | 0.26 | 19.21 | 0 | *** |
|  | *Season:Site* | 13 | 0.43 | 0.03 | 2.51 | 0.004 | ** |
|  | *Residuals* | 156 | 2.08 | 0.01 |  |  |  |
|  |  |  |  |  |  |  |  |
| **NO3-** | *Season* | 1 | 0.84 | 0.84 | 3.88 | 0.051 | . |
|  | *Site* | 13 | 53.58 | 4.12 | 19.05 | 0 | *** |
|  | *Season:Site* | 13 | 8.56 | 0.66 | 3.04 | 0.001 | *** |
|  | *Residuals* | 156 | 33.74 | 0.22 |  |  |  |
|  |  |  |  |  |  |  |  |
| **NH4+** | *Season* | 1 | 0.12 | 0.12 | 1.38 | 0.241 |  |
|  | *Site* | 13 | 10.33 | 0.79 | 9.12 | 0 | *** |
|  | *Season:Site* | 13 | 1.91 | 0.15 | 1.69 | 0.068 | . |
|  | *Residuals* | 163 | 14.2 | 0.09 |  |  |  |
|  |  |  |  |  |  |  |  |
| **PO43-** | *Season* | 1 | 0.31 | 0.31 | 5.07 | 0.026 | * |
|  | *Site* | 13 | 5.98 | 0.46 | 7.44 | 0 | *** |
|  | *Season:Site* | 13 | 1.87 | 0.14 | 2.33 | 0.007 | ** |
|  | *Residuals* | 156 | 9.65 | 0.06 |  |  |  |
|  |  |  |  |  |  |  |  |
| **TSS** | *Season* | 1 | 12.53 | 12.53 | 10.49 | 0.002 | ** |
|  | *Site* | 11 | 19.75 | 1.8 | 1.5 | 0.144 |  |
|  | *Season:Site* | 11 | 17.18 | 1.56 | 1.31 | 0.233 |  |
|  | *Residuals* | 93 | 111.1 | 1.19 |  |  |  |
